# Supplementary material for: The Impact of Open and Closed Kinetic Chain Exercises in Water on Pain and LumboPelvic Stability Men with Non-Special Chronic Back Pain
Source: Research Square preprint supplement (doi:10.21203/rs.3.rs-3817275/v1), 2024-04-29
Supplement: Supplementary file 1 [file e9f821030be3f4af6d1b1086.docx]

**3. Results**

The demographic characteristics of the groups are summarized in Table 2. There was no difference between the groups in age, height, weight, and BMI. Therefore, the data distribution is normal (P > 0.05)

| Table 2:Shapiro–Wilk test result | | | | |
| --- | --- | --- | --- | --- |
| P- value | **Control**  **group**  **(N= 20)** | **OKCE**  **group**  **(N= 20** | **CKCE**  **group**  **(N= 20)** | **Variable** |
| 0.226 | 50.40 ± 5.87 | 46.10 ± 6.06 | 47.806 ± 5.43 | Age(year) |
| 0.419 | 176.10 ± 4.69 | 174.98 ± 6.47 | 172.12 ± 8.34 | Height(cm) |
| 0.657 | 76.79 ± 4.69 | 78.70 ± 11.61 | 84.83 ± 10.21 | Weight(kg) |
| 0.374 | 24.77 ± 1.88 | 28.32 ± 11.4726 | 28.24 ± 3.46 | BMI (kg/m2) |
| 0.209 | 6.30 ± 0.978 | 5.95 ± 0.60 | 6.50 ± 1.46 | PAIN |
| 0.604 | 35.9 ± 45.9 | 9.40 ± 6.76 | 5.30 ± 8.15 | KLAT(mmHg) |
| 0.125 | 28.15 ± 50.1- | -10.05 ± 8.53 | -2.55 ± 13.51 | BKFO(mmHg) |
| 0.554 | 61.9 ± 40.10 | 7.60 ± 8.58 | 7.90 ± 7.86 | ASLR(mmHg) |
| 0.598 | 67.5 ± 30.16 | 15.85 ± 4.28 | 14.20 ± 6.12 | PRONE(mmHg) |

The results showed that there is a significant difference between the variables in the pre-test and post-test(Table 3). Also, the experimental groups CKCE and OKCE with a large effect size had a significant difference in reducing pain (p=0.000, Î·2=0.801)(Table 3), and greater results showed that the experimental groups CKCE and OKCEwith a medium effect size had a significant difference in KLAT(P=0.004,η2.207), BKFO(P=0.048,η2.102), SLR(P=0.035,η2.113) and PRONE(P=0.000, η2.444) the lumbo pelvic control compared to the control group (Table 4).

| **Table 3: Intra-group comparison results for outcome measuring** | | | | | | | | | |
| --- | --- | --- | --- | --- | --- | --- | --- | --- | --- |
| **CKCE group**  **(N= 20)** | | | **OKCE**  **group**  **(N= 20** | | | **Control group**  **(N= 20)** | | | **Variable** |
| P- value | Post test | Pre test | P- value | Post test | Pre test | P- value | Post test | Pre test |
| .0001 | 2.07 ± 1.23 | 6.50 ± 1.46 | .0001 | 1.65 ± 1.22 | 5.95 ± 0.60 | 0.214 | 6.50 ± 1.00 | 6.30 ± 0.978 | PAIN |
| 0.044 | 1.300 ± 1.28 | 5.30 ± 8.15 | .0001 | 2.60 ± 4.00 | 9.40 ± 6.76 | 0.249 | 32.10 ± 55.6 | 35.9 ± 45.9 | KLAT(mmHg) |
| 0.184 | 1.70 ± 1.78 | -2.55 ± 13.51 | .0001 | -2.30 ± 4.47 | -10.05 ± 8.53 | 0.273 | -2.00 ± 14.85 | -1.50 ± 15.28 | BKFO(mmHg) |
| 0.015 | 2.50 ± 1.41 | 7.90 ± 7.86 | 0.029 | 2.35 ± 5.87 | 7.60 ± 8.58 | 0.330 | 07.9 ± 55.10 | 61.9 ± 40.10 | ASLR(mmHg) |
| .0001 | 6.90 ± 4.70 | 14.20 ± 6.12 | .0001 | 5.30 ± 4.60 | 15.85 ± 4.28 | 0.128 | 72.5 ± 25.15 | 67.5 ± 30.16 | PRONE(mmHg) |

| **Table 4: ANCOVA results for outcome measuring** | | | | | | | |
| --- | --- | --- | --- | --- | --- | --- | --- |
| **P- value** | **Partial eta squared** | **Power** | **Sum of Squares** | **Men Squares** | **DF** | **F** | **Variable** |
| **0.000*** | 0.801 | 1 | 264.013 | 132.386 | 2 | 112.386 | PAIN |
| **0.004*** | 0.207 | 0.874 | 692.556 | 346.278 | 2 | 6.158 | KLAT(mmHg) |
| **0.048*** | 0.102 | 1 | 302.448 | 151.224 | 2 | 3.198 | BKFO(mmHg) |
| **0.035*** | 0.113 | 0.639 | 236.829 | 118.414 | 2 | 3.568 | ASLR(mmHg) |
| **0.000*** | 0.444 | 1 | 10710.360 | 535.680 | 2 | 22.327 | PRONE(mmHg) |

* Significant difference between groups (P <0.05)
